# Supplementary material for: Influence of Repressive Histone and DNA Methylation upon D4Z4 Transcription in Non-Myogenic Cells
Source: PubMed Central journal article supplement (PMC4965136; doi:10.1371/journal.pone.0160022), 2016-07-28
Supplement: pone.0160022.s002.pdf [file pone.0160022.s002.pdf]

**A****MYOD1**Relative expression  
normalized to HCT116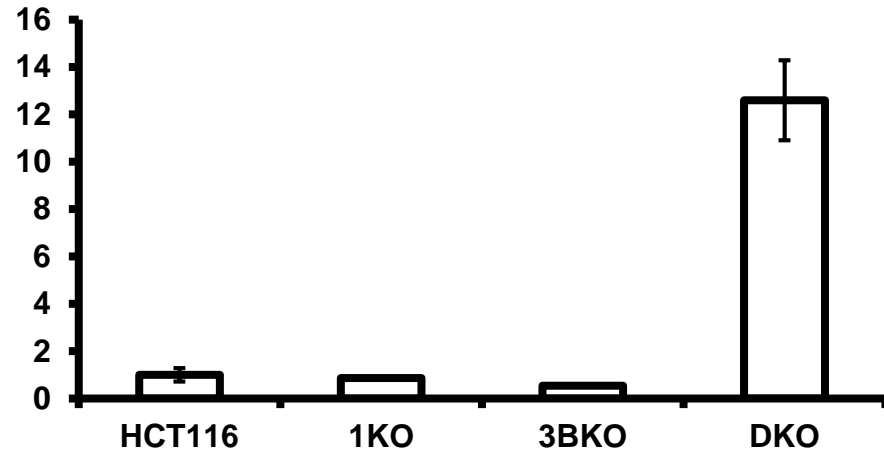**MYH2**Relative expression  
normalized to HCT116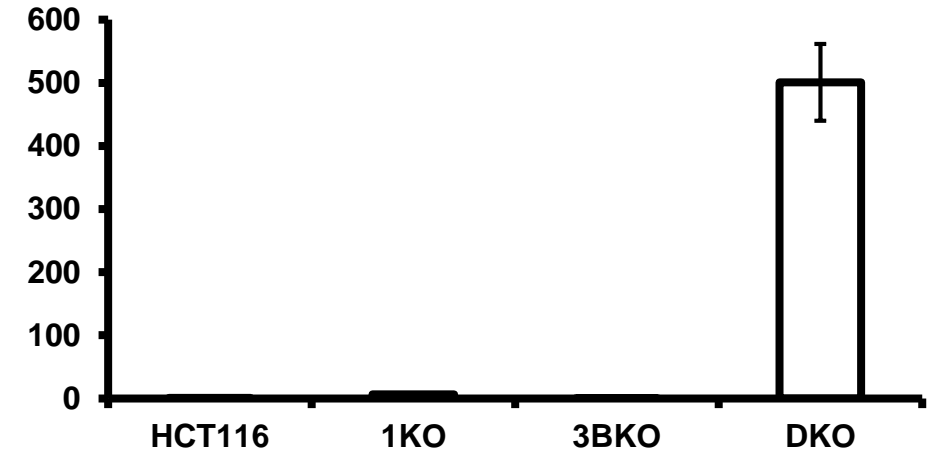**B**Relative expression  
normalized to  
untreated controls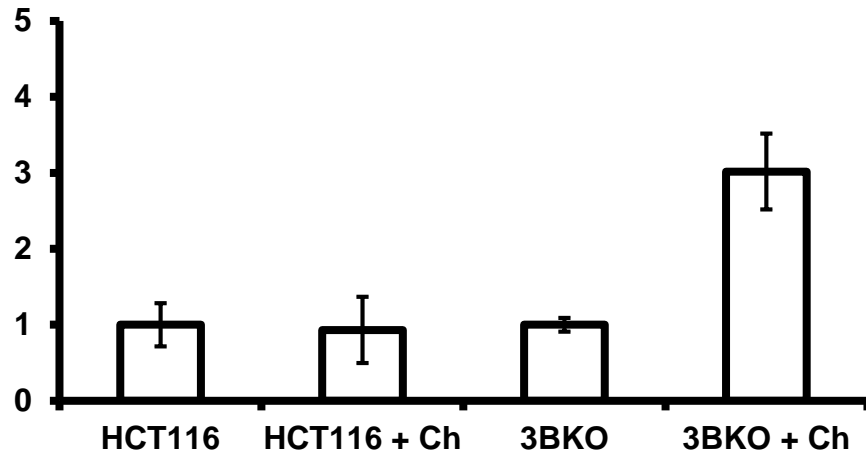Relative expression  
normalized to  
untreated controls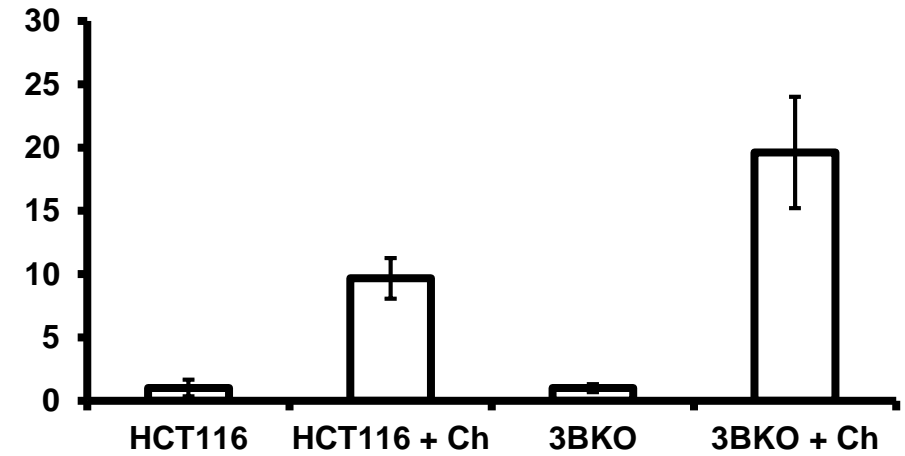

## Figure legend

### Supplemental Fig. 2. Changes in expression levels of *MYOD1* and *MYH2* transcripts in HCT116 and its DNMT KOs

(A) Results of qRT-PCR for *MYOD1* (left) and *MYH2* (right) transcription in HCT116, 1KO, 3BKO and DKO displayed in the same manner as in Fig 3C (with respect to HCT116, set arbitrarily at 1).

(B) Results of qRT-PCR for *MYOD1* (left) and *MYH2* (right) transcription in untreated and chaetocin treated HCT116 and 3BKO, displayed in the same manner as in Fig 3C (with respect to untreated HCT116 and 3BKO, set arbitrarily at 1).

### Primers used for qRT-PCR of myogenic genes (5' to 3')

#### **MYOD1**

qMYOD1-F1: TCGAAACACGGGTCGTCAT

qMYOD1-R1: CGGCGGAACTGCTACGAAG

#### **MYH2**

qMYH2-F1: GGACCAACTGAGTGAAGTAAA

qMYH2-R1: TTGCCTCTTGATAACTGAGACAC
