# Supplementary material for: Influence of Repressive Histone and DNA Methylation upon D4Z4 Transcription in Non-Myogenic Cells
Source: PubMed Central journal article supplement (PMC4965136; doi:10.1371/journal.pone.0160022), 2016-07-28
Supplement: pone.0160022.s004.pdf [file pone.0160022.s004.pdf]

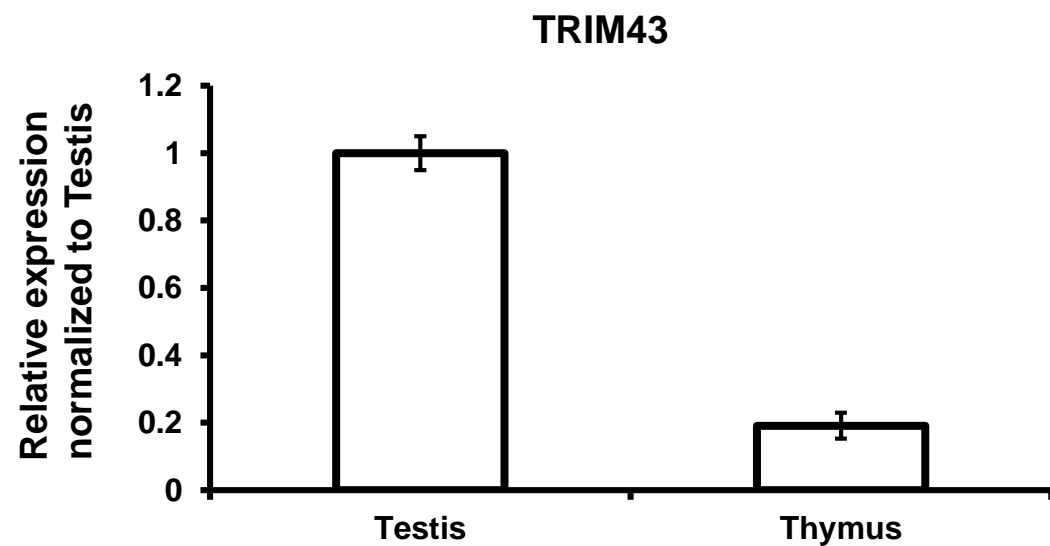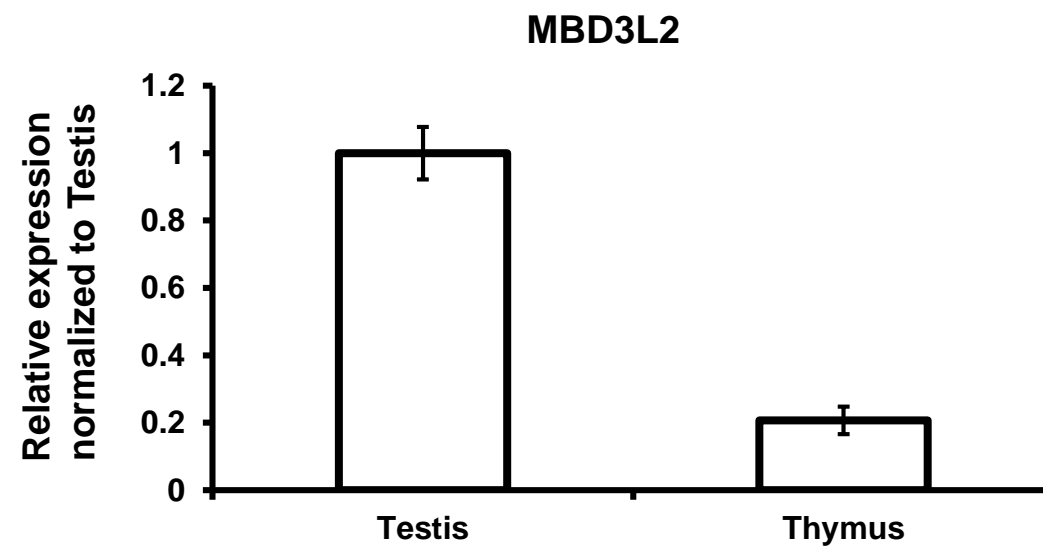**Figure legend****Supplemental Figure S3. DUX4 target gene expression in thymus and testis**

Results of qRT-PCR for DUX4 target genes *TRIM43* and *MBD3L2* in pooled thymus and testis samples (X-axis) expressed as fold change relative to expression in testis (arbitrarily set at 1; Y-axis), normalized with respect to GAPDH expression. All values are obtained by averaging results from triplicates for each sample.
