# Supplementary material for: Influence of Repressive Histone and DNA Methylation upon D4Z4 Transcription in Non-Myogenic Cells
Source: PubMed Central journal article supplement (PMC4965136; doi:10.1371/journal.pone.0160022), 2016-07-28
Supplement: pone.0160022.s005.pdf [file pone.0160022.s005.pdf]

**Supplementary Table 1: Tissue Total RNA Samples**

Product: Human Total RNA Master Panel II/Clontech (Cat. No. 636643, Lot Number, 1001243A).

| <b>Tissue</b>     | <b>Source</b>                                                                         |
|-------------------|---------------------------------------------------------------------------------------|
| Bone Marrow       | Pooled from 3 male Asians, ages: 56-67                                                |
| Brain, cerebellum | Pooled from 10 male/female Caucasians, ages: 22-68                                    |
| Brain (whole)     | 18-year-old male Caucasian                                                            |
| Fetal brain       | Pooled from 59 spontaneously aborted male/female Caucasian fetuses, age: 20-33 weeks  |
| Fetal liver       | Pooled from 63 spontaneously aborted male/female Caucasian fetuses, ages: 22-40 weeks |
| Heart             | Pooled from 3 male Caucasians, ages: 30-39                                            |
| Liver             | 51-year-old male Caucasian                                                            |
| Lung              | Pooled from 3 male/female Caucasians, ages: 32-61                                     |
| Prostate          | Pooled from 12 Caucasians, ages: 20-58                                                |
| Salivary gland    | Pooled from 24 male/female Caucasians, ages: 16-60                                    |
| Skeletal muscle   | Pooled from 2 male/female Caucasians, ages: 43-46                                     |
| Spleen            | Pooled from 12 male/female Caucasians, ages: 18-54                                    |
| Testis            | Pooled from 39 Caucasians, ages: 14-64                                                |
| Thymus            | Pooled from 2 male Caucasians, ages: 18-57                                            |
| Trachea           | Pooled from 22 male/female Caucasians, ages: 18-54                                    |
| Uterus            | Pooled from 8 Caucasians, ages: 23-63                                                 |
| Colon w/mucosa    | 23-year-old female Caucasian                                                          |
| Small intestine   | Pooled from 5 male/female Caucasians, ages: 20-61                                     |
| Spinal cord       | Pooled from 22 male/female Caucasians, ages: 20-69                                    |
| Stomach           | 50-year-old male Caucasian                                                            |
| Ovary*            | 47-year-old female                                                                    |

\*Source: Agilent Technologies, Catalog Number 540071
